# Supplementary material for: DDX6 modulates P-body and stress granule assembly, composition, and docking
Source: PubMed Central journal article supplement (PMC10978804; doi:10.1083/jcb.202306022), 2024-03-27

Source data for Fig. S5c

DDX6 KO cells

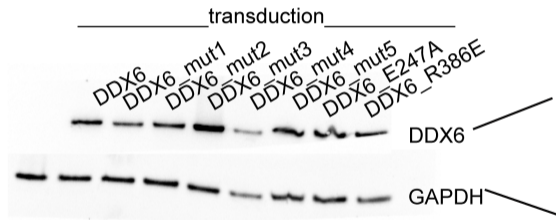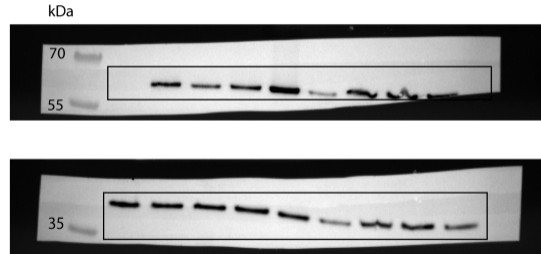

Supplement: JCB_202306022_SourceDataFS5.pdf [file JCB_202306022_SourceDataFS5.pdf]
